# Supplementary material
Source: Springer Nature journal article supplement (https://www.springermedizin.de/resource/supplementary/12936_2008_856_MOESM2_ESM.pdf/9548390)
Supplement: MOESM2 [file 9548390]

124 patients enrolled for AL Treatment

Kamrup (Assam)

Day 0

53

Day 3

53

Evaluable by  
day 28 not  
PCR corrected

53

Keonjhar (Orissa)

71

1 loss

70

1 LPF

1 LCF

68
